## **TIGIT as a therapeutic target of HPV-positive head and neck squamous cell carcinomas**

Xiuning Le, Minghao Dang, Venkatesh L. Hegde, Bo Jiang, Ravaen Slay, Weihong Xiao, Keiko Akagi, Joseph Fresquez, Kathrina L. Marcelo, Qianyun Luo, Pragya Sinha, Ananta V. Yanamandra, Joe Dan Dunn, Diana Bell, Michelle Williams, Edwin Parra, Ryan Goepfert, Stephen H. Lai, Neil Gross, Amit Agrawal, Alexandre Reuben, Jeffrey Myers, Michael A. Curran, K. Jagannadha Sastry, Linghua Wang, Maura L. Gillison

The authors have withdrawn their manuscript because a major revision is in progress to incorporate additional data. Therefore, the authors do not wish this work to be cited as reference for the project. If you have any questions, please contact the corresponding author.
